# Supplementary material for: The metabolic response of the Bradypus sloth to temperature
Source: PeerJ. 2018 Sep 19;6:e5600. doi: 10.7717/peerj.5600 (PMC6151113; doi:10.7717/peerj.5600)
Supplement: Data S1 [file peerj-06-5600-s011.xlsx]

## Sheet: Sheet1
Animal ID	Sex	Mass (g)	Oxygen (%)	Carbon dioxide (%)	RQ	Ta (℃)	Posture	RMR (ml O2/h)	Tb (℃)
1/a	Male	3000	20.706	0.28716	0.869267	21.46	1	1143.3	30.4278
1/a	Male	3000	20.567	0.33828	0.738526	28.1	4	1646.71	31.2192
1/a	Male	3000	20.539	0.35592	0.754687	29.33	2	1746.06	31.544
1/a	Male	3000	20.535	0.3501	0.721216	30.5	5	1754.42	31.6297
1/a	Male	3000	20.534	0.33832	0.707464	31.1	4	1754.73	31.7453
1/a	Male	3000	20.572	0.29585	0.724794	32.4	3	1604.78	32.752
1/a	Male	3000	20.584	0.2625	0.705301	32.9	2	1557.23	NA
2/a	Male	3900	20.8108	0.298925	1.01157	27	4	743.3	NA
2/a	Male	3900	20.7944	0.30898	1.02242	27	3	841.11	NA
2/a	Male	3900	20.8061	0.266727	0.985101	27	4	771.172	NA
2/b	Male	3900	20.6883	0.363617	0.907802	23.4333	2	679.427	NA
2/b	Male	3900	20.6747	0.370783	0.908347	24.1	2	726.621	NA
2/b	Male	3900	20.669	0.3102	0.790139	26.1833	4	741.645	NA
2/b	Male	3900	20.6633	0.300067	0.774082	27.85	5	757.461	NA
2/b	Male	3900	20.6615	0.295983	0.832601	29.92	1	758.695	NA
2/b	Male	3900	20.6657	0.275217	0.840599	32.5333	3	737.762	NA
2/b	Male	3900	20.6752	0.26438	0.856699	32.55	4	704.678	NA
2/b	Male	3900	20.6795	0.25742	0.875593	33.4	6	687.744	NA
2/c	Male	4000	20.7133	0.188575	0.783677	25.35	2	1172.91	33.5047
2/c	Male	4000	20.6777	0.244467	0.811227	28.1	4	1316.65	33.413
2/c	Male	4000	20.642	0.257583	0.768666	28.3333	4	1470.32	33.5088
2/c	Male	4000	20.6513	0.267133	0.790624	31.6	3	1414.51	33.8497
2/c	Male	4000	20.6403	0.262543	0.763592	31.6	4	1461.91	33.9298
3/a	Female	4400	20.8292	0.213383	1.03167	27.6	3	553.989	NA
3/a	Female	4400	20.774	0.21852	0.975432	27.6	2	914.245	NA
3/b	Female	5100	20.8123	0.1055	0.712243	23.4	2	555.374	NA
3/b	Female	5100	20.8199	0.09935	0.838616	27.425	4	610.328	NA
3/b	Female	5100	20.8296	0.089325	0.99477	27.775	5	572.498	NA
3/b	Female	5100	20.791	0.1116	0.998035	30.2	5	968.72	NA
3/b	Female	5100	20.7674	0.127023	1.03194	33.0143	5	511.455	NA
4/a	Female	3900	20.8308	0.2555	1.01187	28.6	2	902.749	NA
4/a	Female	3900	20.8359	0.2169	0.919923	26.6	2	875.445	NA
4/b	Female	3800	20.7118	0.312625	0.879108	23.075	2	1308.62	NA
4/b	Female	3800	20.6867	0.345111	0.927983	24.7778	2	1463.3	NA
4/b	Female	3800	20.6822	0.348	0.933666	25.14	2	1490.37	NA
4/b	Female	3800	20.6716	0.350429	0.922475	25.5571	2	1556.82	NA
4/b	Female	3800	20.6732	0.34825	0.921166	27.375	2	1562.69	NA
4/b	Female	3800	20.6743	0.352333	0.94607	28	3	1552.4	NA
4/b	Female	3800	20.6923	0.258	0.749681	28.475	1	1433.6	NA
4/b	Female	3800	20.709	0.257429	0.811968	29.1857	5	1321.7	NA
4/b	Female	3800	20.695	0.272	0.869576	31	3	935.985	NA
4/b	Female	3800	20.7017	0.293	0.951086	31.7333	3	905.178	NA
4/b	Female	3800	20.7227	0.283667	0.983703	31.9	2	814.786	NA
5/a	Male	4000	20.798	0.19475	0.992617	22.65	1	385.145	NA
5/a	Male	4000	20.7692	0.1992	0.955812	23.5	1	549.449	NA
5/a	Male	4000	20.7482	0.20325	0.932549	24.3667	1	651.434	NA
5/a	Male	4000	20.7427	0.196167	0.914372	25.4667	2	676.538	NA
5/a	Male	4000	20.7199	0.2025	0.893558	26.6667	2	741.893	NA
5/a	Male	4000	20.716	0.213817	0.914205	27.0333	2	759.037	NA
5/a	Male	4000	20.6775	0.21725	0.859775	27.95	1	879.408	NA
5/a	Male	4000	20.6762	0.208275	0.848574	29.85	5	879.285	NA
5/a	Male	4000	20.6747	0.217025	0.869364	29.9	5	885.612	NA
5/a	Male	4000	20.6929	0.194125	0.857384	30.15	4	887.414	NA
5/a	Male	4000	20.7088	0.1854	0.883248	31.1	5	809.356	NA
5/a	Male	4000	20.7333	0.21	1.00996	33	4	689.068	NA
6/a	Female	3300	20.7852	0.1846	0.961749	23.2667	2	285.878	NA
6/a	Female	3300	20.7094	0.221516	0.892092	23.9053	1	635.174	NA
6/a	Female	3300	20.6698	0.240778	0.864128	24.45	2	816.544	NA
6/b	Female	4400	20.7348	0.221825	1.02355	22.6	4	324.43	NA
6/b	Female	4400	20.7303	0.226567	1.04303	22.9	2	341.193	NA
6/b	Female	4400	20.6397	0.260533	1.02134	30.1	3	675.62	NA
6/b	Female	4400	20.636	0.247475	0.992481	30.6	3	885.005	NA
6/b	Female	4400	20.6077	0.2451	0.951955	33	5	788.965	NA
6/b	Female	4400	20.578	0.255667	0.908759	32.8	3	900.571	NA
6/b	Female	4400	20.57	0.258	0.905545	32.75	2	930.679	NA
6/c	Female	3600	20.8923	0.1257	0.907516	22.05	1	673.114	30.3695
6/c	Female	3600	20.8483	0.193025	0.913893	23	1	841.267	30.195
6/c	Female	3600	20.7505	0.2253	0.760572	25.2	2	1209.93	30.3345
6/c	Female	3600	20.7108	0.240575	0.699574	26.5	3	1356.45	30.6717
6/c	Female	3600	20.6943	0.289875	0.710352	29.35	4	1406.08	30.7484
6/c	Female	3600	20.6907	0.3005	0.712401	30.1	5	1416.12	30.8981
6/c	Female	3600	20.7515	0.308275	0.820136	30.9	4	1183.47	31.1123
6/c	Female	3600	20.8207	0.30015	0.89303	32.6333	4	983.528	31.557
6/c	Female	3600	20.8383	0.245867	0.782648	33.8	6	909.232	32.3593
6/c	Female	3600	20.845	0.235	0.756566	33.9	4	882.32	NA
7/a	Female	3100	20.8694	0.1512	0.983733	25.8	4	212.016	NA
7/a	Female	3100	20.8452	0.174111	0.988811	25.875	4	317.41	NA
7/a	Female	3100	20.7379	0.194	0.80619	28.6	3	778.57	NA
7/a	Female	3100	20.7268	0.2005	0.799651	29	3	825.48	NA
7/b	female	3800	20.909	0.157575	0.914244	21.2	1	444.715	NA
7/b	female	3800	20.88	0.248679	0.99112	21.7857	3	564.687	NA
7/b	female	3800	20.8677	0.237967	0.976338	22.3	3	615.013	NA
7/b	female	3800	20.8577	0.267167	1.00411	25.2833	2	649.942	NA
7/b	female	3800	20.8462	0.25166	0.78015	27.8	5	599.248	NA
7/b	female	3800	20.8569	0.268811	0.808533	31.08	5	640.798	NA
7/b	female	3800	20.8377	0.3593	0.983261	31.5	5	717.466	NA
7/b	female	3800	20.8061	0.366686	0.86663	33.55	5	783.066	NA
7/b	female	3800	20.7879	0.392938	0.820745	34.025	5	850.077	NA
7/b	female	3800	20.8014	0.4002	0.850128	33.65	5	800.545	NA
8/a	Male	4400	20.597	0.375571	0.869	26.4667	3	1075.43	33.4297
8/a	Male	4400	20.5983	0.378792	0.875185	26.7167	2	1069.42	33.6678
8/a	Male	4400	20.555	0.38095	0.775876	29.8333	4	1233.64	34.5597
8/a	Male	4400	20.6251	0.293988	0.746934	30.075	5	948.778	34.9022
